# Supplementary material
Source: PubMed Central journal article supplement (PMC6287730)
Supplement: jcsm.14.12.2047-supplemental-material.pdf [file jcsm.14.12.2047-supplemental-material.pdf]

Visit 1 and Visit 3 Sleep Questionnaire Data  
 Sleep duration 5 categories; Long sleep duration  
 Crude and Adjusted Odds Ratios for Hypertensive Disorder of Pregnancy and Gestational Diabetes

| Sleep Characteristic Categories | HTN Disorder of Pregnancy |                                              |                                                | Gestational Diabetes |                                              |                                                |
|---------------------------------|---------------------------|----------------------------------------------|------------------------------------------------|----------------------|----------------------------------------------|------------------------------------------------|
|                                 | n/N (%)                   | Crude OR<br>Estimate (95% CI)                | Adjusted OR <sup>1/</sup><br>Estimate (95% CI) | n/N (%)              | Crude OR<br>Estimate (95% CI)                | Adjusted OR <sup>1/</sup><br>Estimate (95% CI) |
| <b>Visit 1</b>                  |                           |                                              |                                                |                      |                                              |                                                |
| <6 hours                        | 55/393 (14.0)             | 1.22 (0.89, 1.67)                            | 1.04 (0.75, 1.43)                              | 18/392 (4.6)         | 1.28 (0.76, 2.15)                            | 1.23 (0.72, 2.09)                              |
| 6 - <7 hours                    | 140/892 (15.7)            | 1.40 (1.12, 1.74)                            | 1.29 (1.03, 1.61)                              | 49/891 (5.5)         | 1.55 (1.08, 2.21)                            | 1.45 (1.00, 2.08)                              |
| 7 - <8 hours                    | 282/2397 (11.8)           | 1.00                                         | 1.00                                           | 87/2397 (3.6)        | 1.00                                         | 1.00                                           |
| 8 - <9 hours                    | 294/2397 (12.3)           | 1.05 (0.88, 1.25)                            | 1.04 (0.87, 1.24)                              | 86/2393 (3.6)        | 0.99 (0.73, 1.34)                            | 1.08 (0.79, 1.46)                              |
| ≥9 hours                        | 176/1444 (12.2)           | 1.04 (0.85, 1.27)<br><i>p-value = 0.0342</i> | 1.00 (0.81, 1.24)<br><i>p-value = 0.2300</i>   | 55/1444 (3.8)        | 1.05 (0.75, 1.48)<br><i>p-value = 0.1106</i> | 1.39 (0.97, 2.00)<br><i>p-value = 0.2040</i>   |
| ≥9 hours                        | 176/1444 (12.2)           | 0.96 (0.80, 1.14)                            | 0.95 (0.79, 1.14)                              | 55/1444 (3.8)        | 0.96 (0.71, 1.30)                            | 1.25 (0.91, 1.72)                              |
| <9 hours                        | 771/6079 (12.7)           | 1.00<br><i>p-value = 0.6105</i>              | 1.00<br><i>p-value = 0.5559</i>                | 240/6073 (4.0)       | 1.00<br><i>p-value = 0.8034</i>              | 1.00<br><i>p-value = 0.1711</i>                |
| <b>Visit 3</b>                  |                           |                                              |                                                |                      |                                              |                                                |
| <6 hours                        | 66/503 (13.1)             | 1.10 (0.83, 1.46)                            | 0.91 (0.67, 1.22)                              | 23/502 (4.6)         | 1.26 (0.79, 2.01)                            | 1.06 (0.65, 1.72)                              |
| 6 - <7 hours                    | 144/1086 (13.3)           | 1.12 (0.90, 1.38)                            | 1.09 (0.88, 1.35)                              | 47/1084 (4.3)        | 1.19 (0.83, 1.70)                            | 1.20 (0.84, 1.72)                              |
| 7 - <8 hours                    | 316/2621 (12.1)           | 1.00                                         | 1.00                                           | 96/2619 (3.7)        | 1.00                                         | 1.00                                           |
| 8 - <9 hours                    | 249/2174 (11.5)           | 0.94 (0.79, 1.13)                            | 0.92 (0.77, 1.11)                              | 85/2173 (3.9)        | 1.07 (0.79, 1.44)                            | 1.17 (0.86, 1.58)                              |
| ≥9 hours                        | 177/1283 (13.8)           | 1.17 (0.96, 1.42)<br><i>p-value = 0.2540</i> | 1.10 (0.89, 1.37)<br><i>p-value = 0.3973</i>   | 53/1281 (4.1)        | 1.13 (0.81, 1.60)<br><i>p-value = 0.8051</i> | 1.56 (1.08, 2.24)<br><i>p-value = 0.2004</i>   |
| ≥9 hours                        | 177/1283 (13.8)           | 1.16 (0.97, 1.38)                            | 1.13 (0.94, 1.37)                              | 53/1281 (4.1)        | 1.05 (0.78, 1.43)                            | 1.42 (1.03, 1.96)                              |
| <9 hours                        | 775/6384 (12.1)           | 1.00<br><i>p-value = 0.1009</i>              | 1.00<br><i>p-value = 0.2024</i>                | 251/6378 (3.9)       | 1.00<br><i>p-value = 0.7355</i>              | 1.00<br><i>p-value = 0.0320</i>                |

Supplemental Data

Visit 1 and Visit 3 Sleep Questionnaire Data

Crude and Adjusted<sup>1/</sup> Odds Ratios for Hypertensive Disorder of Pregnancy and Gestational Diabetes ; Weekday and Weekend Data

| Sleep Characteristic Categories     | HTN Disorder of Pregnancy |                            |                               | Gestational Diabetes |                            |                               |
|-------------------------------------|---------------------------|----------------------------|-------------------------------|----------------------|----------------------------|-------------------------------|
|                                     | n/N (%)                   | Crude OR Estimate (95% CI) | Adjusted OR Estimate (95% CI) | n/N (%)              | Crude OR Estimate (95% CI) | Adjusted OR Estimate (95% CI) |
| <b>Visit 1</b>                      |                           |                            |                               |                      |                            |                               |
| Sleep Duration (Calculated WEEKDAY) |                           |                            |                               |                      |                            |                               |
| <7 hours                            | 256/1807 (14.2)           | 1.20 (1.03, 1.40)          | 1.13 (0.96, 1.33)             | 89/1805 (4.9)        | 1.41 (1.09, 1.82)          | 1.23 (0.94, 1.60)             |
| ≥7 hours                            | 656/5426 (12.1)           | 1.00                       | 1.00                          | 193/5422 (3.6)       | 1.00                       | 1.00                          |
|                                     |                           | <i>p-value = 0.0213</i>    | <i>p-value = 0.1311</i>       |                      | <i>p-value = 0.0095</i>    | <i>p-value = 0.1271</i>       |
| Sleep Duration (Calculated WKEND)   |                           |                            |                               |                      |                            |                               |
| <7 hours                            | 96/700 (13.7)             | 1.11 (0.88, 1.39)          | 0.96 (0.76, 1.22)             | 36/699 (5.2)         | 1.41 (0.99, 2.02)          | 1.23 (0.85, 1.77)             |
| ≥7 hours                            | 809/6455 (12.5)           | 1.00                       | 1.00                          | 239/6450 (3.7)       | 1.00                       | 1.00                          |
|                                     |                           | <i>p-value = 0.3719</i>    | <i>p-value = 0.7408</i>       |                      | <i>p-value = 0.0604</i>    | <i>p-value = 0.2795</i>       |
| Sleep Midpoint (WEEKDAY)            |                           |                            |                               |                      |                            |                               |
| >5 AM                               | 107/663 (16.1)            | 1.38 (1.11, 1.72)          | 1.27 (1.00, 1.60)             | 30/663 (4.5)         | 1.19 (0.81, 1.75)          | 1.51 (1.01, 2.25)             |
| ≤5 AM                               | 805/6570 (12.3)           | 1.00                       | 1.00                          | 252/6564 (3.8)       | 1.00                       | 1.00                          |
|                                     |                           | <i>p-value = 0.0042</i>    | <i>p-value = 0.0460</i>       |                      | <i>p-value = 0.3852</i>    | <i>p-value = 0.0464</i>       |
| Sleep Midpoint (WKEND)              |                           |                            |                               |                      |                            |                               |
| >5 AM                               | 209/1566 (13.3)           | 1.08 (0.92, 1.28)          | 0.99 (0.83, 1.18)             | 77/1567 (4.9)        | 1.41 (1.07, 1.84)          | 1.71 (1.28, 2.28)             |
| ≤5 AM                               | 696/5589 (12.5)           | 1.00                       | 1.00                          | 198/5582 (3.5)       | 1.00                       | 1.00                          |
|                                     |                           | <i>p-value = 0.3475</i>    | <i>p-value = 0.8869</i>       |                      | <i>p-value = 0.0133</i>    | <i>p-value = 0.0003</i>       |
| <b>Visit 3</b>                      |                           |                            |                               |                      |                            |                               |
| Sleep Duration (Calculated WEEKDAY) |                           |                            |                               |                      |                            |                               |
| <7 hours                            | 259/2090 (12.4)           | 1.00 (0.85, 1.16)          | 0.94 (0.80, 1.10)             | 91/2086 (4.4)        | 1.17 (0.91, 1.51)          | 1.00 (0.77, 1.31)             |
| ≥7 hours                            | 646/5193 (12.4)           | 1.00                       | 1.00                          | 195/5190 (3.8)       | 1.00                       | 1.00                          |
|                                     |                           | <i>p-value = 0.9557</i>    | <i>p-value = 0.4324</i>       |                      | <i>p-value = 0.2300</i>    | <i>p-value = 0.9708</i>       |
| Sleep Duration (Calculated WKEND)   |                           |                            |                               |                      |                            |                               |
| <7 hours                            | 118/845 (14.0)            | 1.20 (0.98, 1.48)          | 1.08 (0.87, 1.34)             | 36/842 (4.3)         | 1.14 (0.80, 1.63)          | 1.00 (0.69, 1.44)             |
| ≥7 hours                            | 762/6414 (11.9)           | 1.00                       | 1.00                          | 242/6409 (3.8)       | 1.00                       | 1.00                          |
|                                     |                           | <i>p-value = 0.0813</i>    | <i>p-value = 0.4937</i>       |                      | <i>p-value = 0.4781</i>    | <i>p-value = 0.9978</i>       |
| Sleep Midpoint (WEEKDAY)            |                           |                            |                               |                      |                            |                               |
| >5 AM                               | 94/686 (13.7)             | 1.13 (0.90, 1.43)          | 1.05 (0.82, 1.33)             | 31/686 (4.5)         | 1.18 (0.80, 1.72)          | 1.36 (0.90, 2.05)             |
| ≤5 AM                               | 811/6597 (12.3)           | 1.00                       | 1.00                          | 255/6590 (3.9)       | 1.00                       | 1.00                          |
|                                     |                           | <i>p-value = 0.2872</i>    | <i>p-value = 0.7192</i>       |                      | <i>p-value = 0.4052</i>    | <i>p-value = 0.1395</i>       |
| Sleep Midpoint (WKEND)              |                           |                            |                               |                      |                            |                               |
| >5 AM                               | 177/1466 (12.1)           | 0.99 (0.83, 1.19)          | 0.91 (0.76, 1.10)             | 75/1467 (5.1)        | 1.48 (1.13, 1.94)          | 1.87 (1.40, 2.49)             |
| ≤5 AM                               | 703/5793 (12.1)           | 1.00                       | 1.00                          | 203/5784 (3.5)       | 1.00                       | 1.00                          |
|                                     |                           | <i>p-value = 0.9485</i>    | <i>p-value = 0.3475</i>       |                      | <i>p-value = 0.0045</i>    | <i>p-value &lt; 0.0001</i>    |

<sup>1/</sup> Odds ratios are adjusted for age and BMI.
